# Supplementary material
Source: Springer Nature journal article supplement (https://www.springermedizin.de/resource/supplementary/12936_2010_1585_MOESM1_ESM.pdf/9541744)
Supplement: MOESM1 [file 9541744]

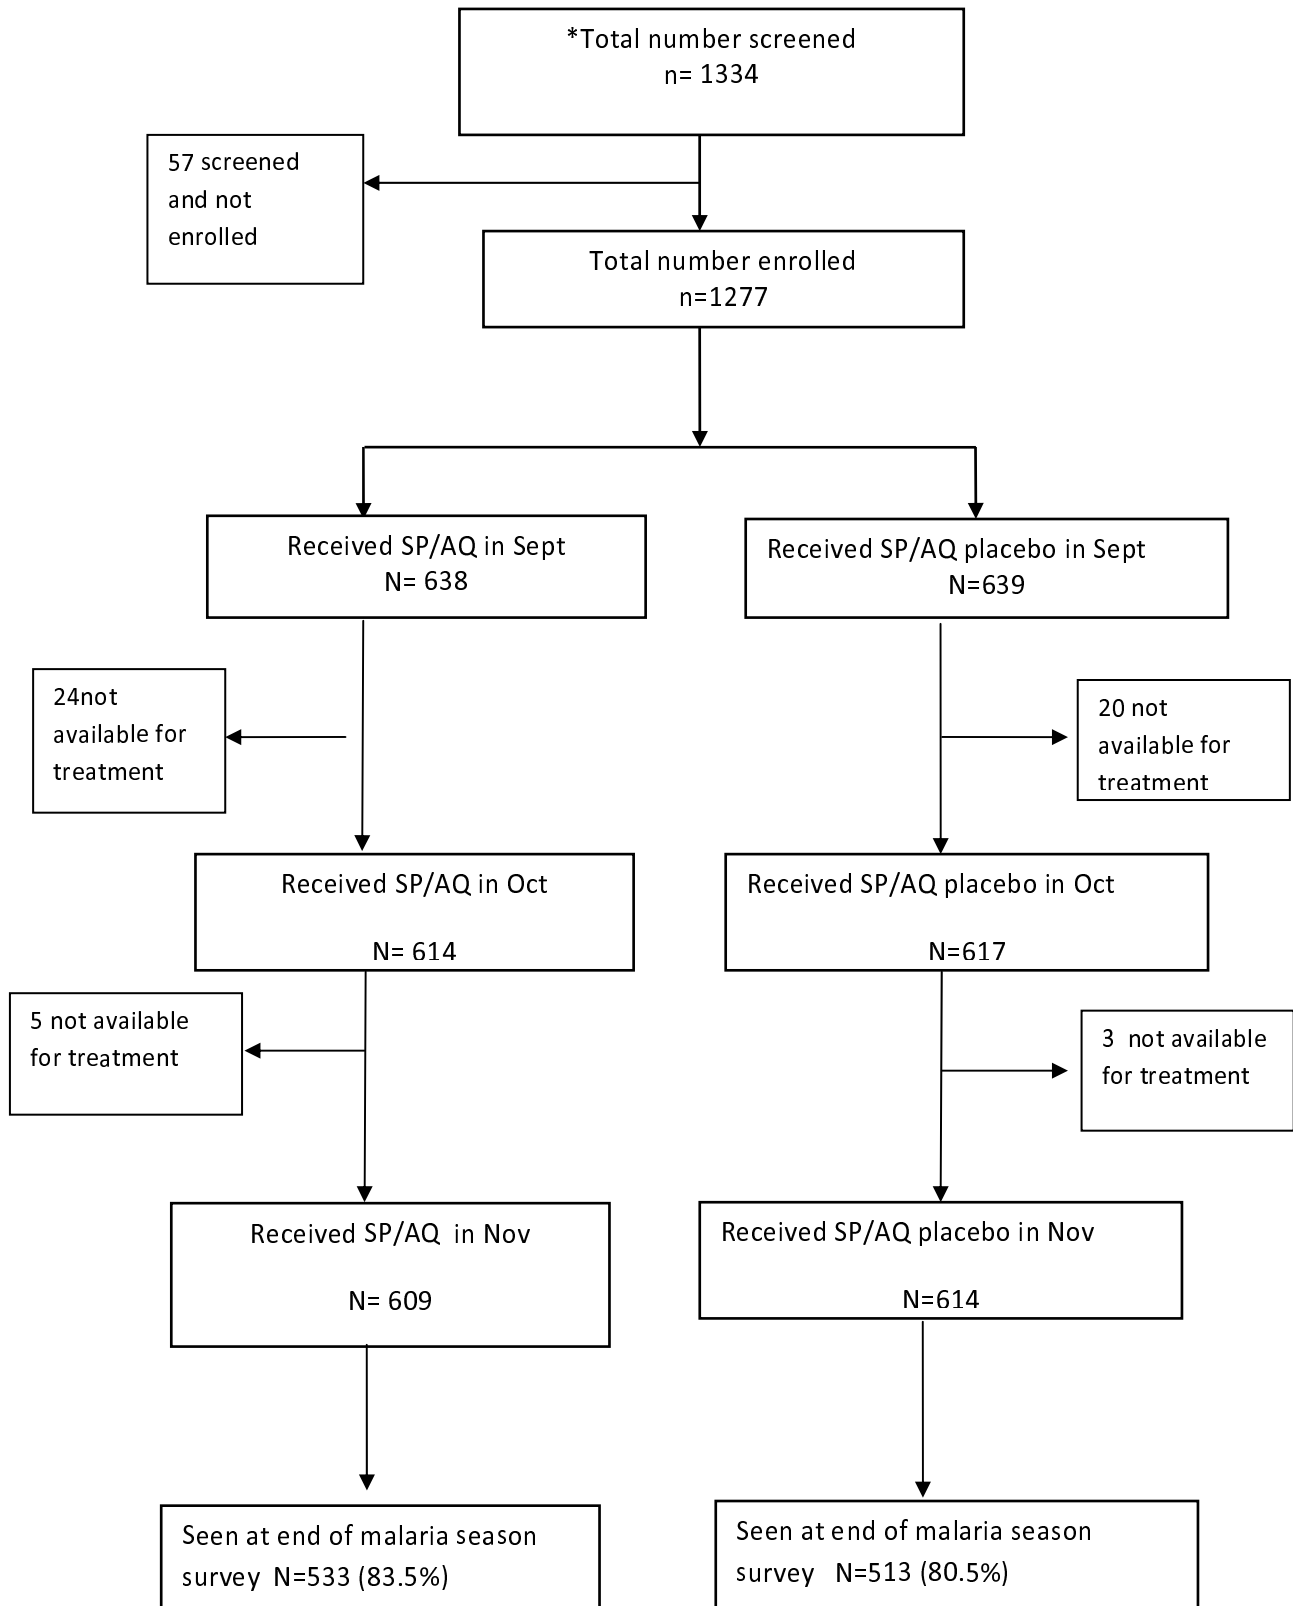

\* The remaining children were not studied because they did not meet the inclusion criteria, no consent was given or had one of the exclusion criteria
